# Supplementary material
Source: HighWire-hosted journal article supplement (https://fn.bmj.com/content/110/2/213)
Supplement: inline-supplementary-material-1 [file inline-supplementary-material-1.pdf]

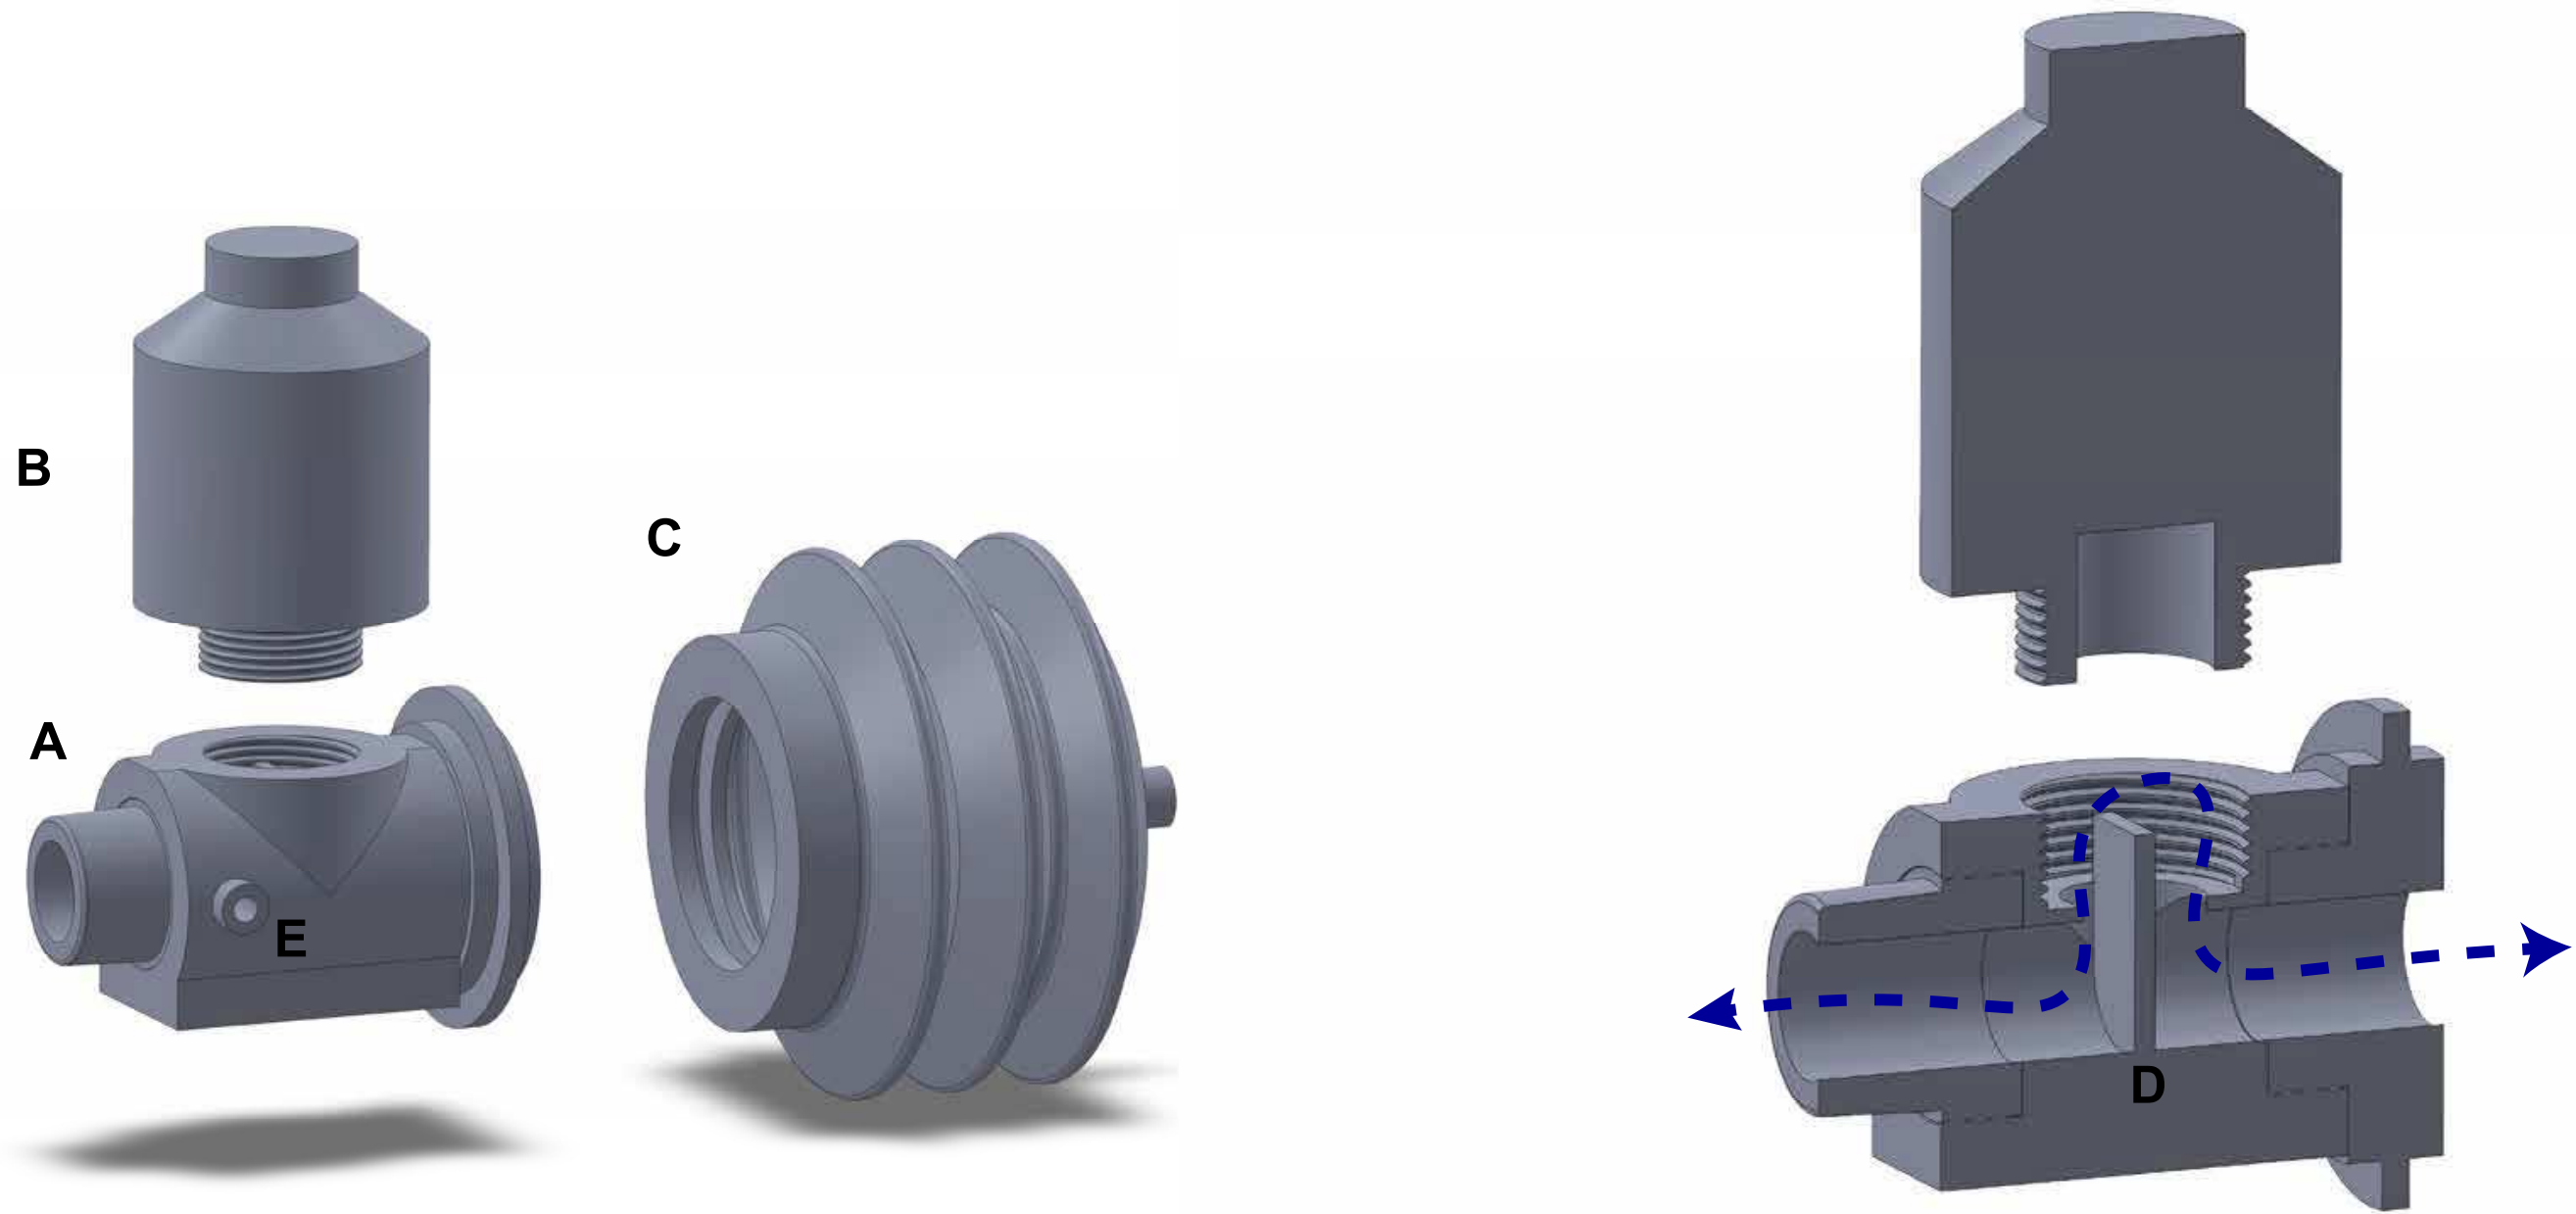

**Supplemental Figure 1:** Illustration of the T-connector (A) used for oxygen sensor (B) and the bellows (C). Compared to standard oxygen cell connectors the internal volume was reduced and a participating wall (D) diverts flow to the sensor (blue dashed line in section view to the right). This was to reduce the dead space and the response time of the oxygen measurements. STEP files for 3D printing can be requested from the corresponding author. The leak was connected before (E) the participating wall.
